# Supplementary material for: Transport, properties, and life cycles of mesoscale eddies in the eastern tropical South Pacific
Source: Copernicus journal article supplement (doi:10.5194/os-14-731-2018), 2018-07-31
Supplement: Supplementary file 1 [file os-14-731-2018-supplement.zip]

Archive with 7 entries (7 files):
- FigS2.png
- FigS4.png
- Czeschel_etal_supplement.pdf
- FigS3.png
- FigS1.png
- movie_sshdtdaily_stratus13_floats.mov
- os-14-731-2018-supplement-title-page.pdf
