# Supplementary material for: Transport, properties, and life cycles of mesoscale eddies in the eastern tropical South Pacific
Source: Copernicus journal article supplement (doi:10.5194/os-14-731-2018), 2018-07-31
Supplement: Supplementary file 1 [file os-14-731-2018-supplement.zip › os-14-731-2018-supplement-title-page.pdf]

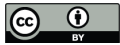

## *Supplement of*

# **Transport, properties, and life cycles of mesoscale eddies in the eastern tropical South Pacific**

**Rena Czeschel et al.**

*Correspondence to:* Rena Czeschel ([rczeschel@geomar.de](mailto:rczeschel@geomar.de))

- [os-14-731-2018-supplement-title-page.pdf](#)
- [Czeschel\\_et\\_al\\_supplement.pdf](#)
- [FigS1.png](#)
- [FigS2.png](#)
- [FigS3.png](#)
- [FigS4.png](#)
- [movie\\_sshdtdaily\\_stratus13\\_floats.mov](#)

The copyright of individual parts of the supplement might differ from the CC BY 4.0 License.
