# Supplementary figures and images for: Transport, properties, and life cycles of mesoscale eddies in the eastern tropical South Pacific
Source: Copernicus journal article supplement (doi:10.5194/os-14-731-2018), 2018-07-31

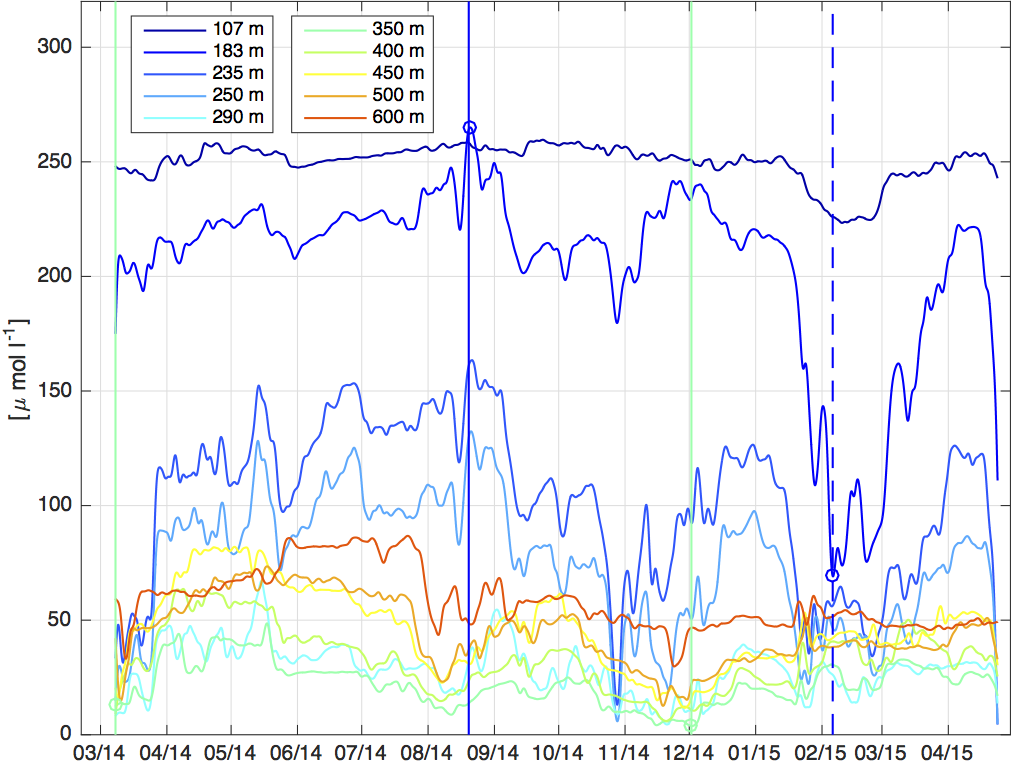

Supplement: Supplementary file 1 [file os-14-731-2018-supplement.zip › FigS2.png]

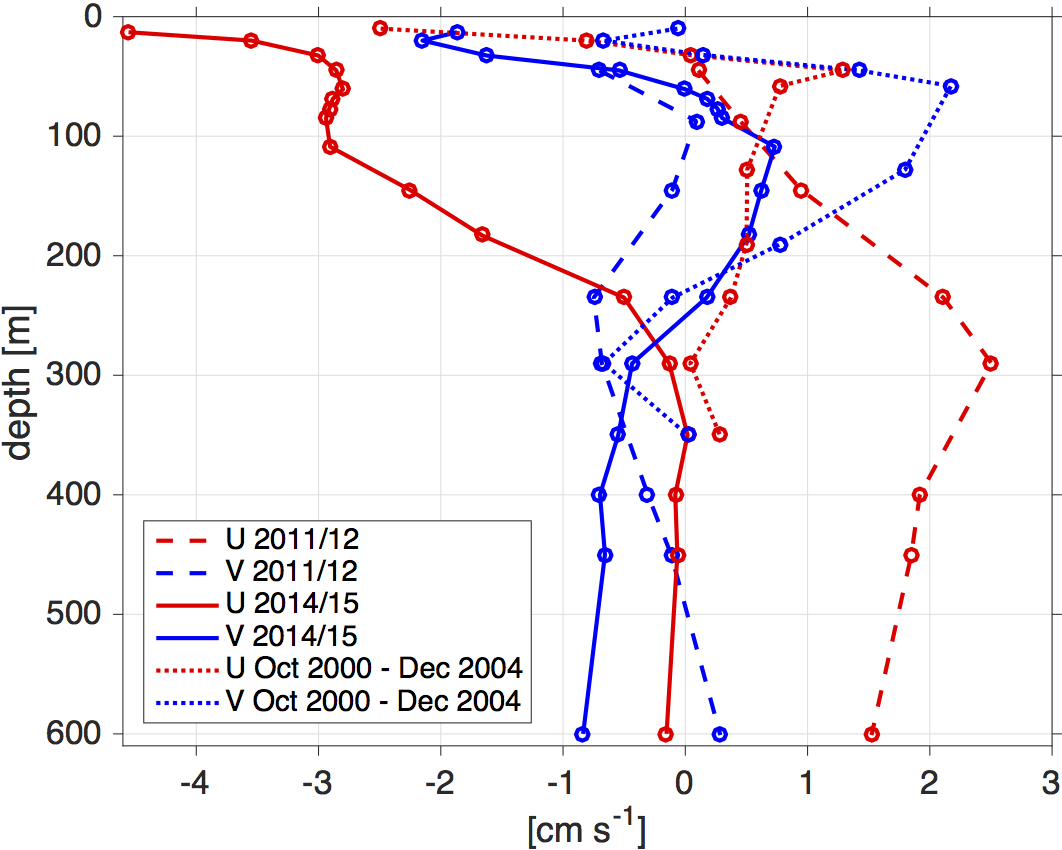

Supplement: Supplementary file 1 [file os-14-731-2018-supplement.zip › FigS4.png]

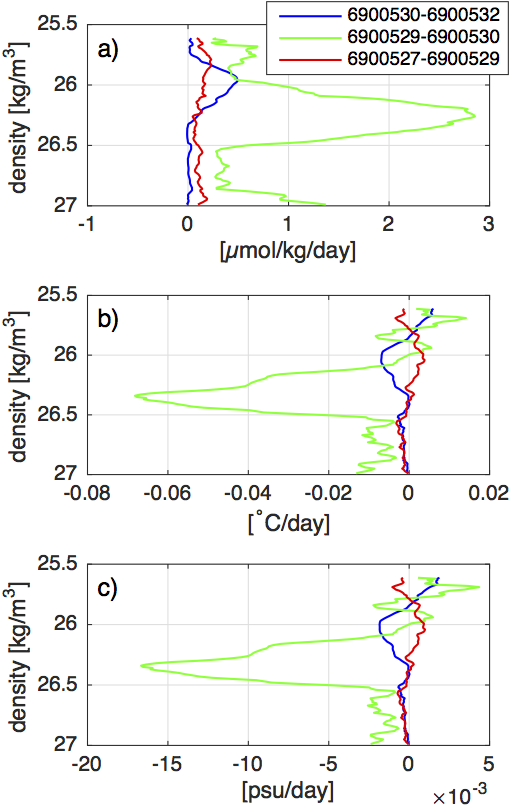

Supplement: Supplementary file 1 [file os-14-731-2018-supplement.zip › FigS3.png]

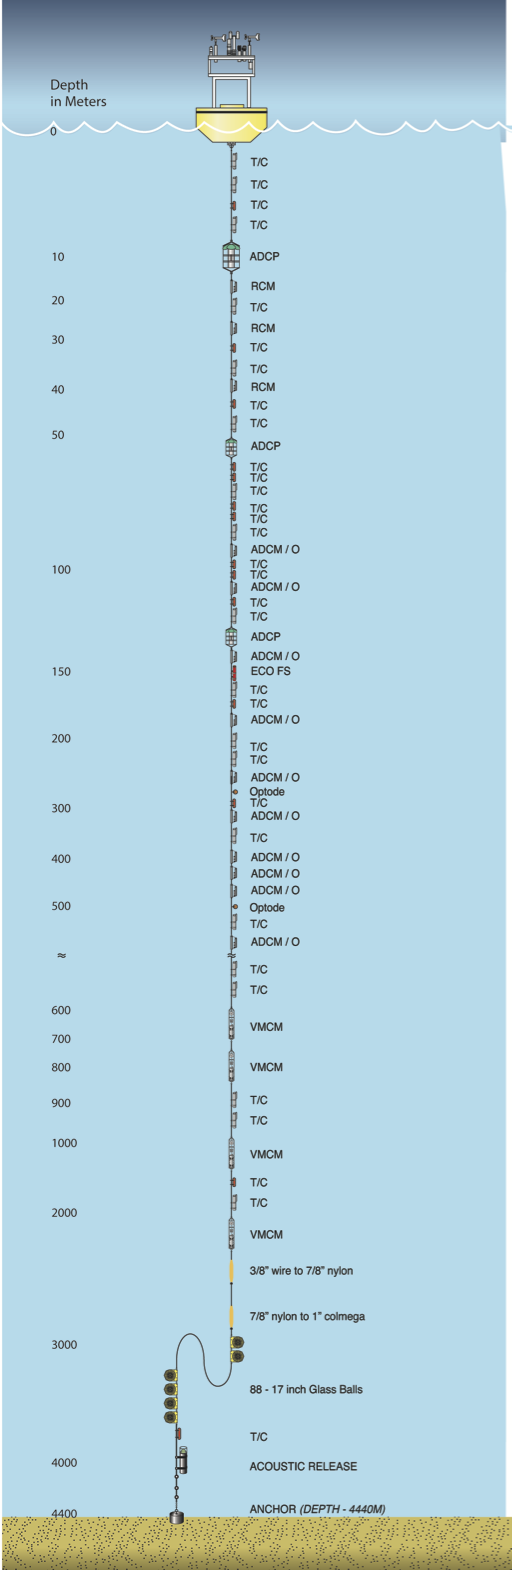

Supplement: Supplementary file 1 [file os-14-731-2018-supplement.zip › FigS1.png]
